# Supplementary material for: How much is the lack of retention evidence costing trial teams in Ireland and the UK?
Source: Trials. 2022 May 12;23:396. doi: 10.1186/s13063-022-06223-x (PMC9097420; doi:10.1186/s13063-022-06223-x)
Supplement: Supplementary file 2 — Additional file 2. [file 13063_2022_6223_MOESM2_ESM.xlsx]

## Sheet: Ireland
Assumptions
500 participants
10 sites
1 year follow up
Trial will have 3 visits
Intervention
			Hourly rate (Ireland)							Costs of developing and electronically posting
		Staff hours	Research Nurse	Staff costs							Staff costs	Mailchimp (electronic emailing)		Frequency of activity	Total cost (staff costs x 2) plus flat charge of the 12 month mailchimp
Newsletter	Developing newsletter	5	54	270							320	151.78		2	791.78
			Research assistant			Postage costs	Number of participants/years		Total postage costs
	Emailing newsletter	2	25	50		151.78	1		151.78	Costs of developing and manually posting
	Manually stuffing 500 envelopes and posting	8	25	200		1.1	500		550		Staff costs	Postage costs	staff and postage costs	Frequency of activity	Total costs
											470	550	1020	2	2040
			Hourly rate (Ireland)
A timeline of participant visits for sites -Site Reminder		Staff hours	Data Manager	Staff costs per 1 site
	Developing reminder schedule software	3	25	75
	Emailing the reminder schedule software to the sites for the sites to use (10minutes/0.167 hours)	0.167	25	4.175
Total costs for site reminder schedule				79.175
A timeline of participant visits for sites - Participant Reminder		Staff hours	Research Nurse	Staff cost per 1 participant		Number of participants	Staff cost per 500 participants	Frequency of activity (done for each trial visit which is 3)	Total costs = total staff costs x frequenct of acitivty
	Research Nurse directly contacts patient - 5 mins/0.08hrs per participant	0.08	54	4.32		500	2160	3	6480
Time spent trying to contact participant - average of 2 calls - minute per failed attempt - 2 minutes per participant	Failed call attempts per participant (2 minutes/0.033hours for 2 failed calls)	0.033	54	1.782		500	891	3	2673
Cost for particpant remdiner schedule									9153
Cost of site reminder schedule									79.175
Total cost of Participant reminder schedule									9232.17
			Hourly rate (Ireland)
		Staff hours	Research assistant	Total staff costs		Stamp costs (sending out)	Stamp cost (return pre-paid)	Total stamp costs	Number of participants	Total postage costs	Frequency of activity	Total costs = (staff costs + postage costs) x frequency of activity
Inclusion of pre-paid envelopes	Manually stuffing the 500 envelopes	8	25	200		1.1	1.1	2.2	500	1100	1	1300
Reminder schedule	Manually stuffing the 150 envelopes	2.4	25	60		1.1	1.1	2.2	150	330	1	390
Total costs for pre-paid and reminder schedule												1690
			Hourly rate (Ireland)
		Staff Hours	Research Nurse	Staff cost per 1 participant		Number of particpants	Staff costs per 500 participants	Frequency of activity	Total costs = total staff costs x frequency of activity
Telephone reminders (for trial visits)	Calling participants (5mins/0.08hrs per participant	0.08	54	4.32		500	2160	3	6480
Time spent trying to contact participant - average of 2 calls - minute per failed attempt - 2 minutes per participant	Failed call attempts per participant (2 minutes/0.033hours for 2 failed calls)	0.033	54	1.782		500	891	3	2673
									9153
			Research assistant			Number of participants	Staff costs per 150 participants	Frequency of activity	Total cost = total staff costs x frequency of activity
Telephone reminder schedule for questionnaire response	Calling 150 participants	0.08	25	2		150	300	1	300
Time spent trying to contact participant - average of 2 calls - minute per failed attempt - 2 minutes per participant	Failed call attempts per participant (2 minutes/0.033hours for 2 failed calls)	0.033	25	0.825		150	123.75	1	123.75
									423.75
			Hourly rate (Ireland)
Data collection scheduled with routine care		Staff hours	Research Nurse	Staff costs per 1 participant		Number of particpants	Staff costs per 500 participants	Frequency of activity	Total costs = staff costs x frequncy of acitvity
	Collecting participant data during routine clinic visit (15 minutes/0.25hrs for trial related data collection)	0.25	54	13.5		500	6750	3	20250
Site initiation training on missing data
		Cost per 1 site	Travel costs	Other expenses e.g. overnight expenses	Number of sites	Frequency of activity	Total costs
	Prep, site training and report per site @€400 per day + travel + overnight.	400	100	200	10	1	7000
Investigator meetings face to face
		Cost per 1 site	Travel costs	Other expenses	Number of sites	Frequency of activty	Total costs
	Prep, meeting and report per site @€400 per day + travel + overnight.	400	100	200	10	2	14000
Routine site visits by CTU staff		Costs per 1 sites	Travel costs	Other expenses	Number of sites	Frequency of activity	Total costs
	Prep, site visit and report per site @€400 per day + travel + overnight.	400	100	200	10	2	14000
			Hourly rate (Ireland)
Targeted reruitment of sites/GPs		Staff hours	Research Nurse	Total staff costs per 1 site	Number of sites	Total costs = staff cost x number of sites
	Site selection and assosiated investigation into recruitment (1hour of work per site))	1	54	54	30	1620
Flexibility in appointments - out of hours appointments -		Staff hours	Research Nurse	Number of participants needing out of hours appointments		Total costs = staff hours x staff wage x number of appointments
	Length of appointment (per appointment)	1.5	54	50		4050
	Total costs of each intervention
Newsletters
Manually sending out newsletters	2040
Emailing out newsletters	791.78
A timeline of participant visits for sites
Reminder schedule for sites	79.175
Reminder schedule for participants	9232.17
Inclusion of pre-paid envelopes	1690
Telephone reminders for trial visits	9153
Telephone reminder schedule for questionnaire response	423.75
Data collection scheduled with routine care	20250
Site initiation training on missing data	7000
Investigator meetings face to face	14000
Routine site visits by CTU staff	14000
Targeted reruitment of sites/GPs	1620
Flexibility in appointments - out of hours appointments -	4050

## Sheet: United Kingdom
Assumptions
500 participants
10 sites
1 year follow up
Trial will have 3 visits
Intervention
			Hourly Rate (United Kingdom)
		Staff Hours	Trial manager	Staff costs							Costs of developing and electronically posting	Staff cost	Mailchimp (electronic emailing)		Frequency of activity	Total cost (staff costs x 2) plus flat charge of the 12 month mailchimp
Newsletter	Developing newsletter	5	30.4	152								209.7	130.53		2	549.93
			Research assistant			Postage Costs	Number of participants/years		Total postage costs
	Emailing newsletter	2	28.85	57.7		130.53	1		130.53		Costs of developing and maunally posting
	Manually stuffing 500 envelopes and posting	8	28.85	230.8		0.66	500		330			Staff costs	Postage costs	staff cost and postage cost	Frequency of activity	Total costs
												382.8	330	712.8	2	1425.6
			Hourly rate (United Kingdom)
			Hourly rate (Ireland)
A timeline of participant visits for sites -Site Reminder		Staff hours	Data Manager	Staff costs per 1 site
	Developing reminder schedule software	3	30.4	91.2
	Emailing the reminder schedule software to the sites for the sites to use (10minutes/0.167 hours)	0.167	30.4	5.0768
Total costs for site reminder schedule				96.2768
A timeline of participant visits for sites - Participant reminder		Staff hours	Trial Manager	Staff costs per 1 participant		Number of participants	Staff cost per 500 particpants	Frequency of activity	Total costs = staff costs x frequency of activity
	Trial Manager directly contacts patient - 5 mins/0.08hrs per participant	0.08	30.4	2.432		500	1216	3	3648
Time spent trying to contact participant - average of 2 calls - minute per failed attempt - 2 minutes per participant	Failed call attempts per participant (2 minutes/0.033hours for 2 failed calls)	0.033	30.4	1.0032		500	501.6	3	1504.8
Cost of participant remdiner									5152.8
Cost of site reminder									96.2768
Total cost of Participant reminder schedule									5249.08
			Hourly rate (United Kingdom)
		Staff hours	Research assistant	Staff costs		Stamp costs (sending out)	stamp cost (returning pre-paid)	total stamp cost	number of participants	Total postage costs	frequency of activity	Total costs = staff cost plus postage cost x frequency of activity
Inclusion of pre-paid envelopes	Manually stuffing the 500 envelopes	8	28.85	230.8		0.66	0.66	1.32	500	660	1	890.8
Reminder schedule	Manually stuffing the 150 envelopes	2.4	28.85	69.24		0.66	0.66	1.32	150	198	1	267.24
Total costs for both pre-paid envelopes and reminder schedule												1158.04
			Hourly rate (United Kingdom)
		Staff hours	Trial Manager	Staff costs per 1 participant		Number of participants	Staff cost per 500 participants	Frequency of activity	Total costs = total staff costs x frequency of activity
Telephone reminders (for trial visits)	Calling participants (5mins/0.08hrs per participant	0.08	30.4	2.432		500	1216	3	3648
Time spent trying to contact participant - average of 2 calls - minute per failed attempt - 2 minutes per participant	Failed call attempts per participant (2 minutes/0.033hours for 2 failed calls)	0.033	30.4	1.0032		500	501.6	3	1504.8
									5152.8
			Research assistant
Telephone reminder schedule for questionnaire response	Calling participants (5mins/0.08hrs per participant	0.08	28.85	2.308		150	346.2	1	346.2
Time spent trying to contact participant - average of 2 calls - minute per failed attempt - 2 minutes per participant	Failed call attempts per participant (2 minutes/0.033hours for 2 failed calls)	0.033	28.85	0.95205		150	142.808	1	142.808
									489.008
			Hourly rate (United Kingdom)
Data collection scheduled with routine care		Staff hours	Research Nurse	Staff cost per 1 participant		Number of participants	Staff costs per 500 participants	Frequency of activty	Total costs = total staff costs x frequency of activity
	Collecting participant data during a routine clinic visit (15 minutes/0.25hrs for trial related data collection)	0.25	36	9		500	4500	3	13500
			Hourly rate (United Kingdom)
Site initiation training on missing data		Staff hours	Trial Manager	Staff costs per 1 site		Travel costs	Other expenses e.g. Overnight expenses	Number of sites	Frequency of activity		Total costs
	Trial Manager carries out preparation travels to the sites and carries out training and writes up a report. 11 hours of work in total, travel costs: £100, other expenses: overnight costs: £200	11	30.4	334.4		100	200	10	1		6344
			Hourly rate (United Kingdom)
Investigator meetings face to face		Staff hours	Trial Manager	Staff costs per 1 site		Travel costs	Other expenses e.g. Overnight expenses	Number of sites	Frequency of activity		Total costs
	Trial Manager carries out preparation travels to the sites and carries out training and writes up a report. 11 hours of work in total, travel costs: £100, other expenses: overnight costs: £200	11	30.4	334.4		100	200	10	2		12688
			Hourly rate (United Kingdom)
Routine site visits by CTU staff		Staff hours	Trial Manager	Staff costs per 1 site		Travel costs	Other expenses e.g. Overnight expenses	Number of sites	Frequency of activity		Total costs
	Trial Manager carries out preparation travels to the sites and carries out training and writes up a report. 11 hours of work in total, travel costs: £100, other expenses: overnight costs: £200	11	30.4	334.4		100	200	10	2		12688
			Hourly rate (United Kingdom)
Targeted reruitment of sites/GPs		Staff hours	Trial Manager	Total staff costs per 1 site	Number of sites targeted	Total costs = staff cost x number of sites
	Site selection and assosiated investigation into recruitment (1hour of work per site))	1	30.4	30.4	30	912
			Hourly rate (United Kingdom)
Flexibility in appointments - out of hours appointments		Staff hours	Research Nurse	Number of participants needing out of hours appointments		Total costs = staff hours x staff wage x number of appointments
	Length of appointment (per appointment)	1.5	36	50		2700
	Total costs of each intervention
Newsletters
Manually sending out newsletters	1425.6
Emailing out newsletters	549.93
A timeline of participant visits for sites
Reminder schedule for sites	96.2768
Reminder schedule for particpants	5249.08
Inclusion of pre-paid envelopes	1158.04
Telephone reminders for trial visits	5152.8
Telephone reminder schedule for questionnaire response	489.008
Data collection scheduled with routine care	13500
Site initiation training on missing data	6344
Investigator meetings face to face	12688
Routine site visits by CTU staff	12688
Targeted reruitment of sites/GPs	912
Flexibility in appointments - out of hours appointments	2700

## Sheet: MAMI trial
MAMI trial -
60 participants
Single site
In the netherlands
data collection from the child on day 1,7,28 and at 2yrs old - all done at home by parent -
Also data collection at outpatient clinic prior to birth of the child and data collection at birth
Intervention
			Average Hourly Rate (Netherlands)							Costs of developing and electronically posting
		Staff hours	Research Nurse	Staff costs							Staff costs	Mailchimp (electronic emailing)		Frequency of activity	Total cost
Newsletter	Developing newsletter	5	30	150							154.08	303.56		4	919.88
			Research assistant			Postage costs	Number of participants/years		postage costs
	Emailing newsletter	0.24	17	4.08		151.78	2		303.56	Costs of developing and manually posting
	Manually stuffing 60 envelopes and posting	0.96	17	16.32		0.96	60		57.6		Staff costs	Postage costs	staff cost and postage cost	Frequency of activity	Total costs
											166.32	57.6	223.92	4	895.68
			Average Hourly Rate (Netherlands)
			Hourly rate (Netherlands)
A timeline of participant visits for sites -Site Reminder		Staff hours	Data Manager	Staff costs per 1 site
	Developing reminder schedule software	3	32	96
	Emailing the reminder schedule software to the sites for the sites to use (10minutes/0.167 hours)	0.167	32	5.344
Total costs for site reminder schedule				101.344
A timeline of participant visits for sites - Participant reminder		Staff hours	Research Nurse	Staff costs per 1 particpant		Number of participants	Staff cost per 60 participants	Frequency of activity	Total costs = total staff costs x frequenct of acitivty
	Research Nurse directly contacts patient - 5 mins/0.08hrs per participant	0.08	30	2.4		60	144	1	144
Time spent trying to contact participant - average of 2 calls - minute per failed attempt - 2 minutes per participant	Failed call attempts per participant (2 minutes/0.033hours for 2 failed calls)	0.033	30	0.99		60	59.4	1	59.4
Cost of Participant reminder									203.4
Cost of Site reminder									101.344
Total cost of participant reminder									304.744
			Average Hourly Rate (Netherlands)
		Staff hours	Research assistant	Total staff costs		Stamp costs (sending out)	Stamp cost returning	total stamp costs	Number of participants	total postage costs	frequency of activity	Total cost = staff plus postage x frequency
Inclusion of pre-paid envelopes	Manually stuffing the 60 envelopes	0.96	17	16.32		0.96	0.96	1.92	60	115.2	1	131.52
Reminder schedule	Manually stuffing the 18 envelopes	0.288	17	4.896		0.96	0.96	1.92	18	34.56	1	39.456
Total costs for pre-paid and reminder schedule												170.976
			Average Hourly Rate (Netherlands)
		Staff Hours	Research Nurse	Staff cost per 1 participant		Number of particpants	Staff costs per 60 participants	Frequency of activity	Total costs = total staff costs x frequency of activity
Telephone reminders (for trial visits)	Calling participants (5mins/0.08hrs per participant	0.08	30	2.4		60	144	1	144
Time spent trying to contact participant - average of 2 calls - minute per failed attempt - 2 minutes per participant	Failed call attempts per participant (2 minutes/0.033hours for 2 failed calls)	0.033	30	0.99		60	59.4	1	59.4
									203.4
			Research assistant			Number of participants	Staff costs per 18 participants	Frequency of activity	Total cost = total staff costs x frequency of activity
Telephone reminder schedule for questionnaire response	Calling 18 participants as reminder schedule for questionnaire	0.08	17	1.36		18	24.48	1	24.48
Time spent trying to contact participant - average of 2 calls - minute per failed attempt - 2 minutes per participant	Failed call attempts per participant (2 minutes/0.033hours for 2 failed calls)	0.033	17	0.561		18	10.098	1	10.098
									34.578
		Staff Hours	Research Nurse	Staff cost per 1 participant		Number of particpants	Staff costs per 60 participants	Frequency of activity	Total costs = total staff costs x frequency of activity
Telephone reminders (for at home data collection)	Calling participants (5mins/0.08hrs per participant	0.08	30	2.4		18	43.2	4	172.8
Time spent trying to contact participant - average of 2 calls - minute per failed attempt - 2 attempts per participant	Failed call attempts per participant (2 minutes/0.033hours for 2 failed calls)	0.033	30	0.99		18	17.82	4	71.28
									244.08
Data collection scheduled with routine care		Staff hours	Research Nurse	Staff costs per 1 participant		Number of particpants	Staff costs per 500 participants	Frequency of activity	Total costs = staff costs x frequncy of acitvity
Data collection scheduled with routine care (2 vistis - outpatient clinic and birth)	Collecting participant data during routine clinic visit - 15minutes/0.25hrs	0.25	30	7.5		60	450	2	900
Site initiation training on missing data
		Cost per 1 site	Travel costs	Other expenses e.g. overnight expenses	Number of sites	Frequency of activity	Total costs
	Prep, site visit and report per site @€400 per day. No travel and overnight as it is single centre	400	0	0	1	1	400
Investigator meetings face to face
		Cost per 1 site	Travel costs	Other expenses e.g. overnight expenses	Number of sites	Frequency of activty (4 visits over 2 years)	Total costs
	Prep, site visit and report per site @€400 per day. No travel and overnight as it is single centre	400	0	0	1	4	1600
Routine site visits by CTU staff		Costs per 1 sites	Travel costs	Other expenses e.g. overnight expenses	Number of sites	Frequency of activity (4 visits over 2 years)	Total costs
	Prep, site visit and report per site @€400 per day. No travel and overnight as it is single centre	400	0	0	1	4	1600
			Average Hourly Rate (Netherlands)
Targeted reruitment of sites/GPs		Staff hours	Research Nurse	Total staff costs per 1 site	Number of sites	Total costs = staff cost x number of sites
	Site selection and assosiated investigation into recruitment (1 hour	1	30	30	1	30
			Average Hourly Rate (Netherlands)
Flexibility in appointments - out of hours appointments		Staff hours	Research Nurse	Number of participants needing out of hours appointments		Total costs = staff hours x staff wage x number of appointments
	Length of appointment (per appointment)	1.5	30	6		270
	Total costs of each intervention
Newsletters
Manually sending out newsletters	895.68
Emailing out newsletters	919.88
A timeline of participant visits for sites
Reminder schedule for sites	101.344
Reminder schedule for participants	304.744
Inclusion of pre-paid envelopes	170.976
Telephone reminders for trial visits	203.4
Telephone reminder schedule for questionnaire response	34.578
Telephone reminder for at home data collection	244.08
Data collection scheduled with routine care	900
Site initiation training on missing data	400
Investigator meetings face to face	1600
Routine site visits by CTU staff	1600
Targeted reruitment of sites/GPs	30
Flexibility in appointments - out of hours appointments -	270

## Sheet: MOON trial
Single Centre
154 participants
1 year follow up
3 trial vists
2 postal questionnaires
Intervention
			Hourly Rate (United Kingdom)								Costs of developing and electronically posting
		Staff Hours	Trial manager	Staff costs								Staff cost	Mailchimp 1 year sub (electronic emailing)		Frequency of activity	Total cost
Newsletter	Developing newsletter	5	30.4	152								169.772	130.53		2	470.073
			Research assistant			Postage Costs	Number of participants/years		Total postage costs
	Emailing newsletter	0.616	28.85	17.7716		130.53	1		130.53		Costs of developing and maunally posting
	Manually stuffing 154 envelopes and posting	2.464	28.85	71.0864		0.66	154		101.64			Staff costs	Postage costs		Frequency of activity	Total costs
												223.086	101.64		2	649.453
			Hourly rate (United Kingdom)
A timeline of participant visits for sites -Site Reminder		Staff hours	Data Manager	Staff costs per 1 site
	Developing reminder schedule software	3	30.4	91.2
	Emailing the reminder schedule software to the sites for the sites to use (10minutes/0.167 hours)	0.167	30.4	5.0768
Total costs for site reminder schedule				96.2768
A timeline of participant visits for sites - participant reminder schedule		Staff hours	Trial Manager	Staff costs per 1 participant		Number of participants	Staff cost per 154 particpants	Frequency of activity	Total costs = staff costs x frequency of activity
	Trial Manager directly contacts patient - 5 mins/0.08hrs per participant	0.08	30.4	2.432		154	374.528	3	1123.58
Time spent trying to contact participant - average of 2 calls - minute per failed attempt - 2 minutes per participant	Failed call attempts per participant (2 minutes/0.033hours for 2 failed calls)	0.033	30.4	1.0032		154	154.493	3	463.478
Cost of participant reminder schedule									1587.06
Cost of site reminder schedule									96.2768
Total cost of participant reminder schedule									1683.34
			Hourly rate (United Kingdom)
		Staff hours	Research assistant	Staff costs		Stamp costs (sending out)	Stamp cost (return)	total stamp costs	Number of participants	Postage costs	Frequency of activity	Total costs = staff costs + postage costs x 2
Inclusion of pre-paid envelopes (2 questionnaires are sent out)	Manually stuffing the 154 envelopes	2.464	28.85	71.0864		0.66	0.66	1.32	154	203.28	2	548.733
Reminder schedule	Manually stuffing the 47 envelopes	0.752	28.85	21.6952		0.66	0.66	1.32	47	62.04	2	167.47
Total costs for both pre-paid envelopes and reminder schedule												716.203
			Hourly rate (United Kingdom)
Telephone reminders (for trial visits)		Staff hours	Trial Manager	Staff costs per 1 participant		Number of participants	Staff cost per 154 participants	Frequency of activity	Total costs = total staff costs x frequency of activity
	Calling participants (5mins/0.08hrs per participant	0.08	30.4	2.432		154	374.528	3	1123.58
Time spent trying to contact participant - average of 2 calls - minute per failed attempt - 2 minutes per participant	Failed call attempts per participant (2 minutes/0.033hours for 2 failed calls)	0.033	30.4	1.0032		154	154.493	3	463.478
									1587.06
			Research assistant										0
Telephone reminder schedule for questionnaire response	Calling participants (5mins/0.08hrs per participant	0.08	28.85	2.308		47	108.476	2	216.952
Time spent trying to contact participant - average of 2 calls - minute per failed attempt - 2 minutes per participant	Failed call attempts per participant (2 minutes/0.033hours for 2 failed calls)	0.033	28.85	0.95205		47	44.7463	2	89.4927
									306.445				0
			Hourly rate (United Kingdom)
Data collection scheduled with routine care		Staff hours	Research Nurse	Staff cost per 1 participant		Number of participants	Staff costs per 154 participants	Frequency of activty	Total costs = total staff costs x frequency of activity
	Collecting participant data during a routine clinic visit - 15mintues/0.25hrs	0.25	36	9		154	1386	3	4158				0
			Hourly rate (United Kingdom)
Site initiation training on missing data		Staff hours	Trial Manager	Staff costs per 1 site		Travel costs	Other expenses e.g. Overnight expenses	Number of sites	Frequency of activity		Total costs
	Trial Manager carries out preparation travels to the sites and carries out training and writes up a report. 11 hours of work in total, no travel and overnight as it is single centre	11	30.4	334.4			0	1	1		334.4
			Hourly rate (United Kingdom)
Investigator meetings face to face		Staff hours	Trial Manager	Staff costs per 1 site		Travel costs	Other expenses e.g. Overnight expenses	Number of sites	Frequency of activity		Total costs
	Trial Manager carries out preparation travels to the sites and carries out training and writes up a report. 11 hours of work in total, no travel and overnight as it is single centre	11	30.4	334.4		0	0	1	2		668.8
			Hourly rate (United Kingdom)
Routine site visits by CTU staff		Staff hours	Trial Manager	Staff costs per 1 site		Travel costs	Other expenses e.g. Overnight expenses	Number of sites	Frequency of activity		Total costs
	Trial Manager carries out preparation travels to the sites and carries out training and writes up a report. 11 hours of work in total, no travel and overnight as it is single centre	11	30.4	334.4		0	0	1	2		668.8
			Hourly rate (United Kingdom)
Targeted reruitment of sites/GPs		Staff hours	Trial Manager	Total staff costs per 1 site	Number of sites	Total costs = staff cost x number of sites
	Site selection and assosiated investigation into recruitment (1hour of work per site)	1	30.4	30.4	1	30.4
			Hourly rate (United Kingdom)
Flexibility in appointments - out of hours appointments		Staff hours	Research Nurse	Number of participants needing out of hours appointments		Total costs
	Length of appointment (per appointment)	1.5	36	16		864
	Total costs of each intervention
Newsletters
Manually sending out newsletters	649.453
Emailing out newsletters	470.073
A timeline of participant visits for sites
Reminder schedule for sites	96.2768
Reminder schedule for participants	1683.34
Inclusion of pre-paid envelopes	716.203
Telephone reminders for trial visits	1587.06
Telephone reminder schedule for questionnaire response	306.445
Data collection scheduled with routine care	4158
Site initiation training on missing data	334.4
Investigator meetings face to face	668.8
Routine site visits by CTU staff	668.8
Targeted reruitment of sites/GPs	30.4
Flexibility in appointments - out of hours appointments	864

## Sheet: CINNAMON trial
CINNAMON trial
5 sites
428 participants
2 year follow up - 9 trial visits
Based in the USA
Intervention
			Hourly rate (USA)							Costs of developing and electronically posting
		Staff hours	Research Nurse	Staff costs							Staff costs	Mailchimp 2 year sub (electronic emailing)		Frequency of activity	Total costs = staff costs x 4 plus Mailchimp flat rate
Newsletter	Developing newsletter	5	40	200							234.24	359.76		4	1296.72
			Research assistant			Postage costs	Number of participants/years		Total postage costs
	Emailing newsletter	1.712	20	34.24		179.88	2		359.76	Costs of developing and manually posting
	Manually stuffing 428 envelopes and posting	6.848	20	136.96		0.55	428		235.4		Staff costs	Postage costs	Staff and postage costs	Frequency of activity	Total costs = Staff and postage x 4
											336.96	235.4	572.36	4	2289.44
			Average Hourly rate (USA)
A timeline of participant visits for sites -Site Reminder		Staff hours	Data Manager	Staff costs per 1 site
	Developing reminder schedule software	3	42	126
	Emailing the reminder schedule software to the sites for the sites to use (10minutes/0.167 hours)	0.167	42	7.014
Total costs for site reminder schedule				133.014
A timeline of participant visits for sites		Staff hours	Research Nurse	Staff costs per 1 particpant		Number of participants	Staff cost per 500 participants	Frequency of activity (done for each trial visit which is 9)	Total costs = total staff costs x frequenct of acitivty
	Research Nurse directly contacts patient - 5 mins/0.08hrs per participant	0.08	40	3.2		428	1369.6	9	12326.4
Time spent trying to contact participant - average of 2 calls - minute per failed attempt - 2 minutes per participant	Failed call attempts per participant (2 minutes/0.033hours for 2 failed calls)	0.033	40	1.32		428	564.96	9	5084.64
Cost of reminder schedule for participants									17411
Cost of reminder schedule for sites									133.014
Total cost of reminder schedule for sites									17544.1
			Average Hourly Rate (USA)
		Staff hours	Research assistant	Total staff costs		Stamp costs sending out	Stamp cost return	total stamp cost	Number of participants	Total postage cost	Frequency of activity	Total costs
Inclusion of pre-paid envelopes	Manually stuffing the 428 envelopes	6.848	20	136.96		0.55	0.55	1.1	428	470.8	1	607.76
Reminder schedule	Manually stuffing the 129 envelopes	2.064	20	41.28		0.55	0.55	1.1	129	141.9	1	183.18
Total costs for pre-paid and reminder schedule												790.94
			Average Hourly Rate (USA)
		Staff Hours	Research Nurse	Staff cost per 1 participant		Number of particpants	Staff costs per 428 participants	Frequency of activity	Total costs = total staff costs x frequency of activity
Telephone reminders (for trial visits)	Calling participants (5mins/0.08hrs per participant	0.08	40	3.2		428	1369.6	9	12326.4
Time spent trying to contact participant - average of 2 calls - minute per failed attempt - 2 minutes per participant	Failed call attempts per participant (2 minutes/0.033hours for 2 failed calls)	0.033	40	1.32		428	564.96	9	5084.64
									17411
			Research assistant			Number of participants	Staff costs per 129 participants	Frequency of activity	Total cost = total staff costs x frequency of activity
Telephone reminder schedule for questionnaire response	Calling 129 participants as reminder schedule for questionnaire	0.08	20	1.6		129	206.4	1	206.4
Time spent trying to contact participant - average of 2 calls - minute per failed attempt - 2 minutes per participant	Failed call attempts per participant (2 minutes/0.033hours for 2 failed calls)	0.033	20	0.66		129	85.14	1	85.14
									291.54
			Average Hourly Rate (USA)
Data collection scheduled with routine care		Staff hours	Research Nurse	Staff costs per 1 participant		Number of particpants	Staff costs per 428 participants	Frequency of activity	Total costs = staff costs x frequncy of acitvity
	Collecting participant data during routine clinic visit - 15 minutes/0.25hrs	0.25	40	10		428	4280	9	38520
Site initiation training on missing data
		Cost per 1 site	Travel costs	Other expenses e.g. overnight expenses	Number of sites	Frequency of activity	Total costs
	Prep, site visit and report per site @€400 per day + travel + overnight.	400	100	200	5	1	3500
Investigator meetings face to face
		Cost per 1 site	Travel costs	Other expenses e.g. overnight expenses	Number of sites	Frequency of activity (4 vists over 2 years)	Total costs
	Prep, site visit and report per site @€400 per day + travel + overnight.	400	100	200	5	4	14000
Routine site visits by CTU staff		Costs per 1 sites	Travel costs	Other expenses e.g. overnight expenses	Number of sites	Frequency of activity (4 vists over 2 years)	Total costs
	Prep, site visit and report per site @€400 per day + travel + overnight.	400	100	200	5	4	14000
			Average Hourly Rate (USA)
Targeted reruitment of sites/GPs		Staff hours	Research Nurse	Total staff costs per 1 site	Number of sites (estimate of number of targeted sites)	Total costs = staff cost x number of sites
	Site selection and assosiated investigation into recruitment (1 hour per site)	1	40	40	15	600
			Average Hourly Rate (USA)
Flexibility in appointments - out of hours appointments -		Staff hours	Research Nurse	Number of participants needing out of hours appointments		Total costs = staff hours x staff wage x number of appointments
	Length of appointment (per appointment)	1.5	40	43		2580
	Total costs of each intervention
Newsletters
Manually sending out newsletters	2289.44
Emailing out newsletters	1296.72
A timeline of participant visits for sites
Reminder schedule for sites	133.014
Reminder schedule for participants	17544.1
Inclusion of pre-paid envelopes	790.94
Telephone reminders for trial visits	17411
Telephone reminder schedule for questionnaire response	291.54
Data collection scheduled with routine care	38520
Site initiation training on missing data	3500
Investigator meetings face to face	14000
Routine site visits by CTU staff	14000
Targeted reruitment of sites/GPs	600
Flexibility in appointments - out of hours appointments -	2580
